# Supplementary material for: Interpreting the pathogenicity of Joubert syndrome missense variants in Caenorhabditis elegans
Source: PubMed Central journal article supplement (PMC7859701; doi:10.1242/dmm.046631), 2021-01-26
Supplement: dmm-14-046631-s1.pdf [file dmm-14-046631-s1.pdf]

Figure S1

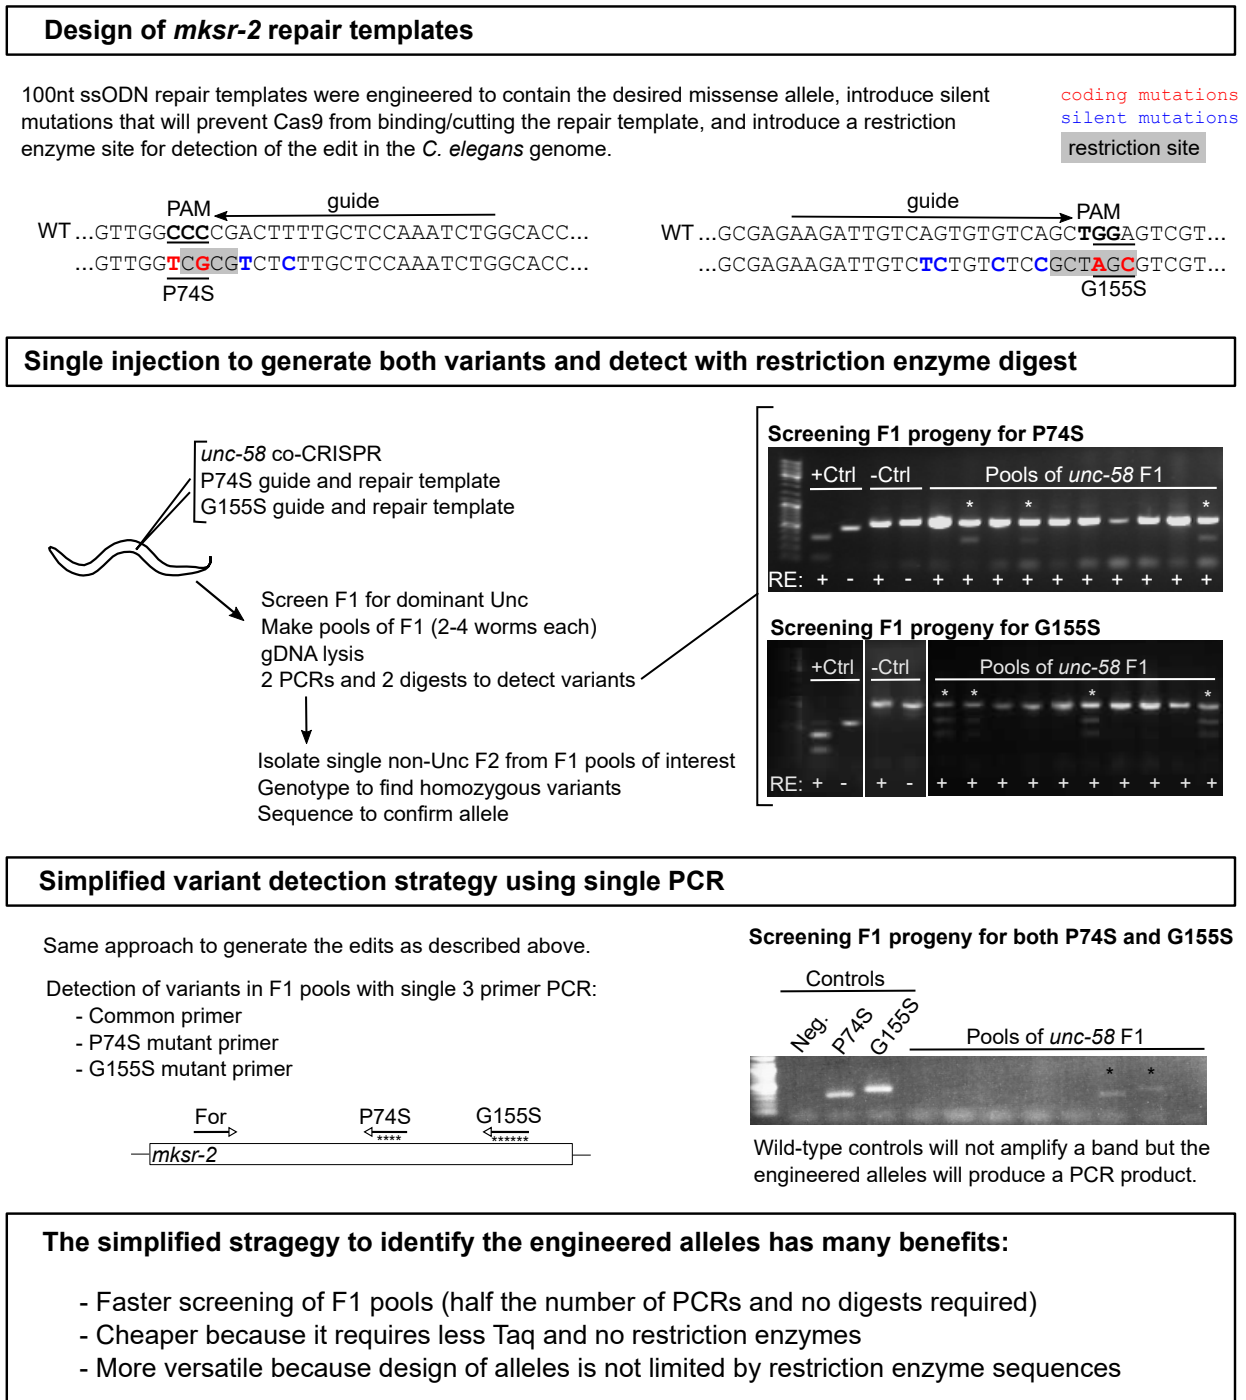

### Figure S1. Design and detection of pathogenic *mksr-2* variants P74S and G155S using CRISPR/Cas9

PAM sequences targeted are shown in bold and the targeted codon is underlined. 100 nucleotide single stranded DNA repair templates were designed to introduce the desired coding variants (red), silent missense mutations (blue), and a restriction site (grey). Silent mutations were included to disrupt the sequence complementary to the guide RNA. The P74S variant introduces a BstUI site while G155S introduces an NheI site. A single injection mix containing the P74S guide RNA, P74S repair template, G155S guide RNA, G155S repair template, and *unc-58* co-CRISPR reagents was used to generate both alleles in one round of injection. 2-4 Unc F1 were pooled to screen for the engineered variants. Two PCR were performed, one for each variant, and then subsequently digested with the appropriate enzyme. The negative control gDNA was isolated from wild-type non-injected worms. The positive control is a PCR product that contains both BstUI and NheI restriction enzyme cut sites. One positive F1 pool was selected for each variant and homozygotes were isolated in the next generation. We sequenced *mksr-2* in both alleles to verify that only the desired engineered mutations were present. This approach was used to generate the mNG tagged variants *mksr-2(oq125 mNG::MKSR-2[P74S])* and *mksr-2(oq126 mNG::MKSR-2[G155S])*. To make the non-tagged version of the variants we used a modified detection strategy. The injection strategy was not altered and these variants were also generated in a single injection. To detect the variants in the F1 pools we performed a single PCR with 3 primers: One common forward primer and two mutant reverse primers that bind the region containing the missense and silent mutations introduced by the engineered alleles. In this PCR approach the wild-type negative control does not generate a PCR product. The previously generated *mksr-2(oq125)* and *mksr-2(oq126)* strains were used as positive controls. This detection strategy was used to generate the *mksr-2(oq137[P74S])* and *mksr-2(oq138[G155S])* variants. This simplified approach to detect the variants is faster, less expensive, and more versatile.

Figure S2

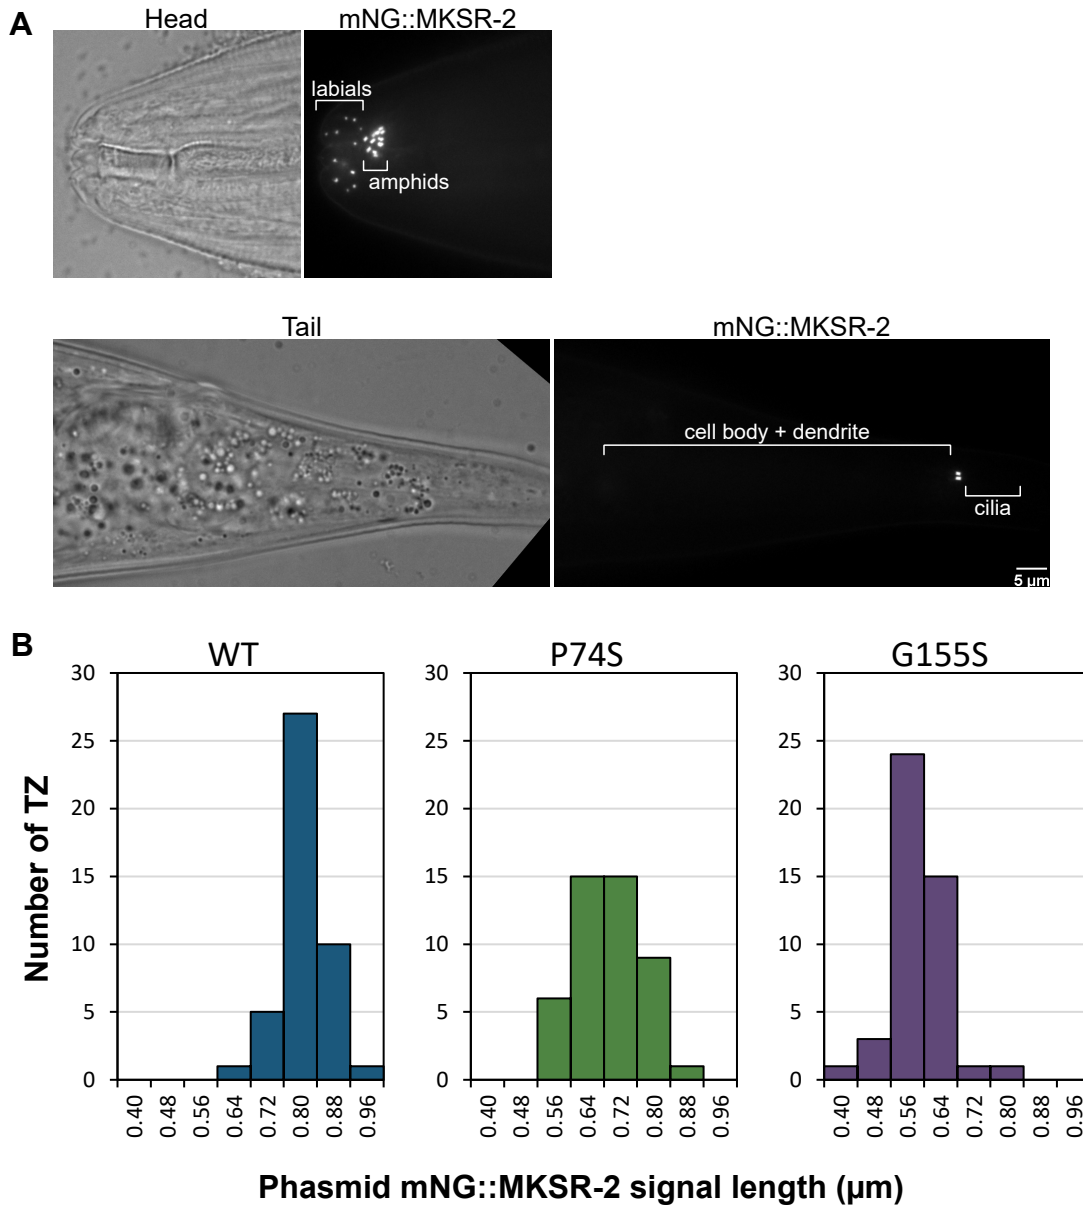

**Figure S2. (Related to Figure 2) mNG::MKSR-2 is specifically localized to the ciliary transition zone**

(A) The fluorescence signal observed in the endogenously expressed wild-type mNG::MKSR-2 strain is very bright and specific to the transition zone. Clear transition zones can be seen in the head at the labial and amphid cilia. In the tail, mNG::MKSR-2 is observed at the transition zone in the phasmids and PQR (not pictured). Signal in the cilia, dendrite, or cell body is not observed in this strain. The scale bar is 5 μm. (B) Histograms of the signal length of mNG::MKSR-2 at the phasmid TZs.

## Figure S3

**A**

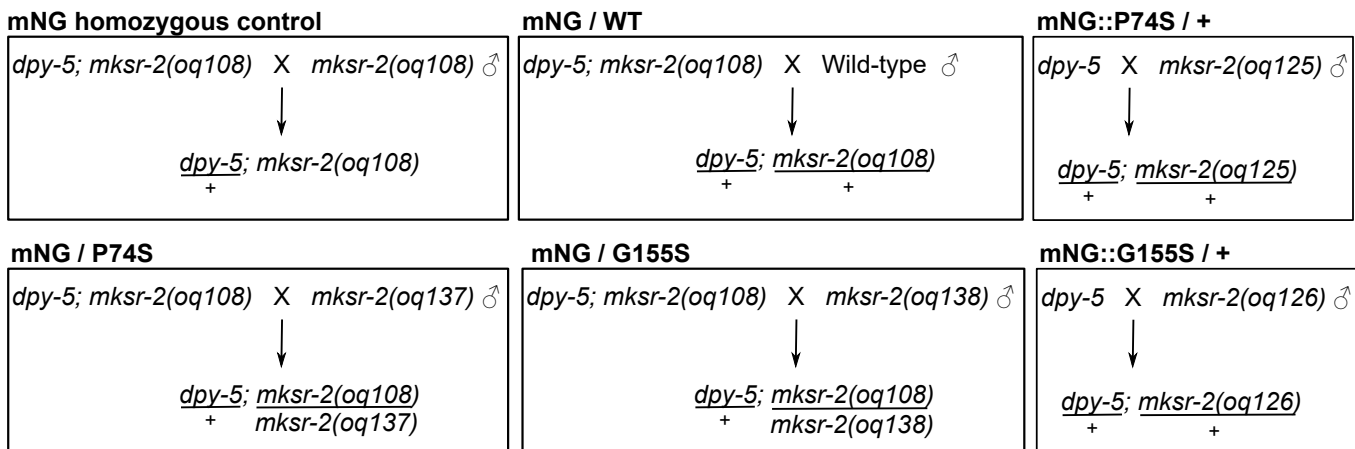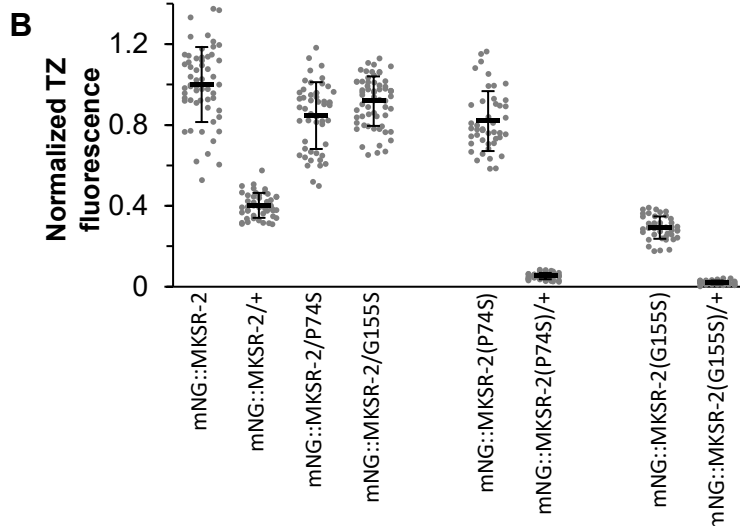

**Figure S3. (Related to Figure 2E) Quantification of fluorescence levels of heterozygous mNG::MKSR-2** (A) Crosses used to generate F1 with mNG::MKSR-2 with a non-tagged *mksr-2* allele and to generate heterozygous F1 with mNG::MKSR-2(P74S)/+ and mNG::MKSR-2(G155S)/+ for Figure 2E. (B) Quantification of the total fluorescence intensity of mNG::MKSR-2 at the transition zone of phasmid cilia. Background fluorescence was subtracted and the signal was normalized to homozygous mNG::MKSR-2. Black lines represent the mean  $\pm$  SD. Total number of TZ pairs measured: mNG::MKSR-2(n=57), mNG::MKSR-2/(n=46), mNG::MKSR-2/P74S(n=50), mNG::MKSR-2/G155S(n=62), mNG::MKSR-2(P74S)(n=45), mNG::MKSR-2(P74S)/(n=48), mNG::MKSR-2(G155S)(n=44), mNG::MKSR-2(G155S)/(n=46). Statistical significance according to one-way ANOVA followed by Tukey's *post hoc* test (p-values: mNG::MKSR-2 vs mNG::MKSR-2/(n=46)  $p=2e-14$ , mNG::MKSR-2 vs mNG::MKSR-2/P74S  $p=5.9e-7$ , mNG::MKSR-2 vs mNG::MKSR-2/G155S  $p=0.011$ , mNG::MKSR-2(P74S) vs mNG::MKSR-2(P74S)/(n=48)  $p=6.9e-14$ , mNG::MKSR-2(G155S) vs mNG::MKSR-2(G155S)/(n=46)  $p=6.9e-14$ ).



Figure S4

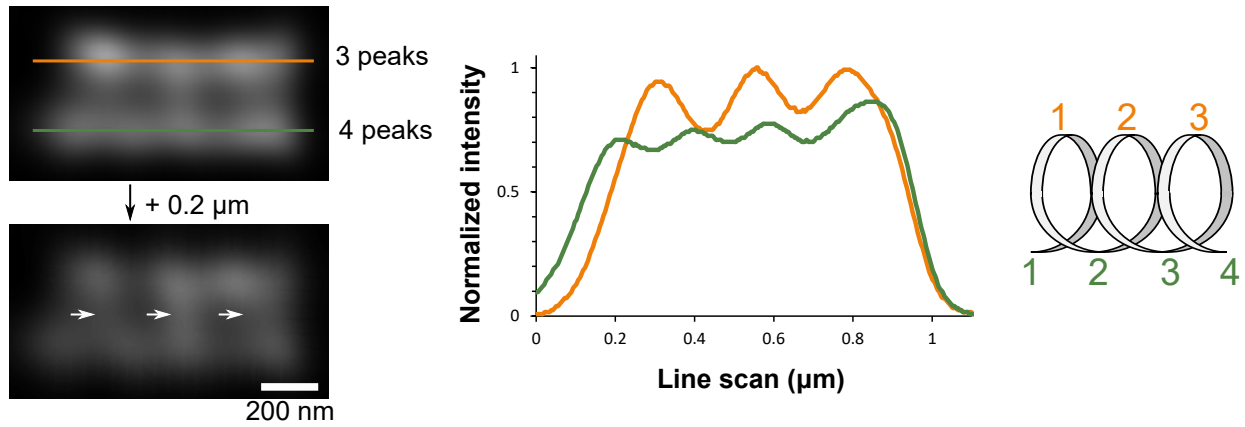

**Figure S4. (Related to Figure 2F) Confocal based super-resolution imaging of mNG::MKSR-2(+)** reveals a possible spiral pattern

The wild-type mNG::MKSR-2 fluorescence signal has discrete peaks of signal along the edge of the transition zone. In this example, line scans along the length of the transition zone show 3 and 4 discrete peaks on each side that are off set. In the next plane of the z-stack, signal that connects the opposite peaks is observed (arrows). A model whereby mNG::MKSR-2 is arranged in a spiral pattern along the transition zone could explain this observation.

**Figure S5**

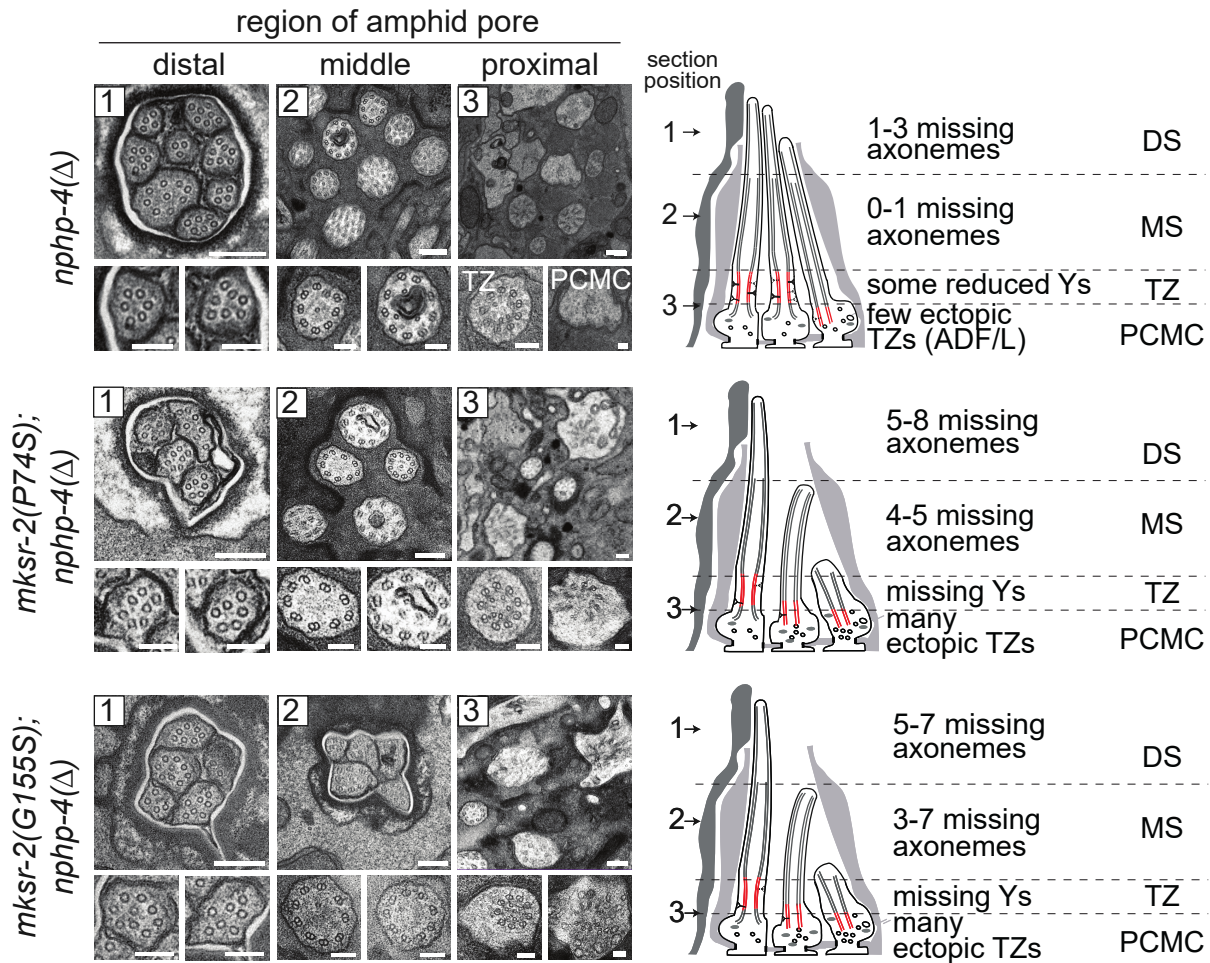

**Figure S5. (Related to Figure 4) Ultrastructure of amphid channel cilia is disrupted by P74S and G155S mutations in *mksr-2*.**

Transmission electron microscopy (TEM) images of the amphid sensory pore, whose channel contains 10 ciliary axonemes, in the indicated genotypes. Images are from cross sections taken from the distal (1), middle (2) and proximal (3) regions of the pore (see schematic for section positions; section position also labelled on the large images). Large images show the pore at low magnification; smaller images show individual cilia at higher magnification. Note that the *nphp-4(Δ)* control images are adapted from (Lambacher et al., 2016). Schematics of the amphid channel (only 3 of the 10 cilia are shown for simplicity) summarize the major ultrastructural features observed. DS; distal segment. MS; middle segment. TZ; transition zone. PCMC; periciliary membrane compartment. Scale bars; 100 nm (small images) and 200 nm (large images).

Figure S6

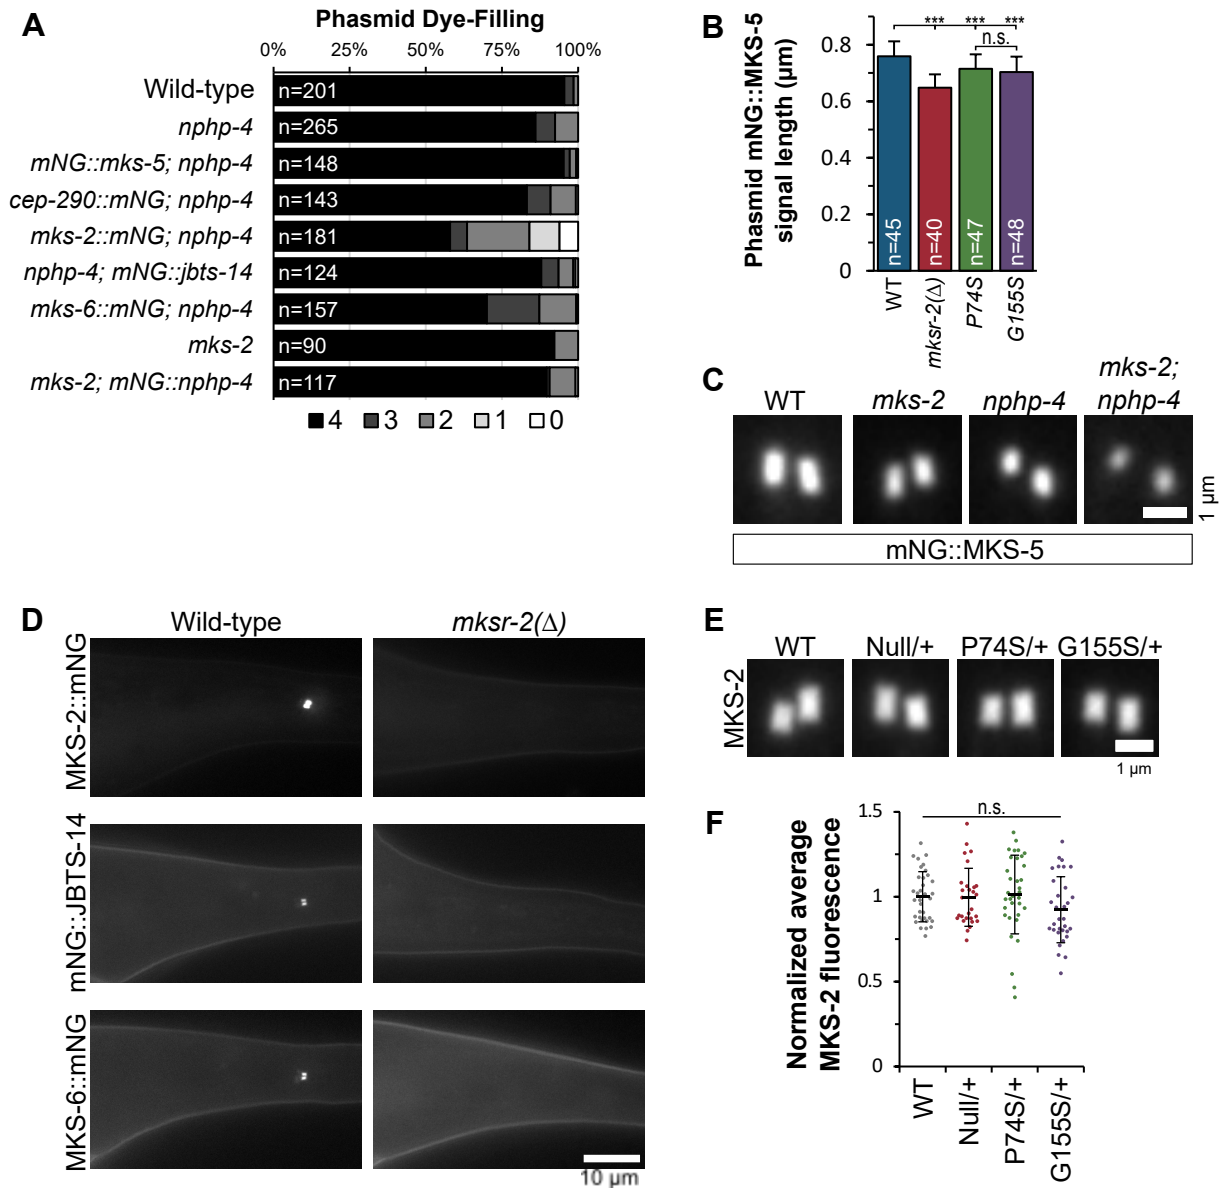

**Figure S6. (Related to Figure 6) mNG knock-ins of additional transition zone proteins**

(A) To assess if the endogenous mNG knock-ins of NPHP-4, MKS-5, CEP-290, MKS-2, JBTS-14, or MKS-6 affect the protein function in the cilia we performed and quantified a dye filling assay. Assays were performed in an *nphp-2* or *mks-2* mutant background. MKS-2::mNG had many dye filling defective worms suggesting that the cilia integrity in these strains is compromised. These strains were still used in subsequent analysis because the observed defects were mild. N values are the number of worms analyzed. (B) The length of the mNG::MKS-5 signal was measured in various *mksr-2* mutants by calculating the “full width at half max” (FWHM) from a line scan down the length of the transition zone. N value is the number of transition zones measured. Statistical significance according to Kruskal-Wallis followed by Dunn’s test (p-values: WT vs *mksr-2* p=2.7e-15, WT vs P74S p=0.001, WT vs G155S p=2.5e-5, P74S vs G155S p=0.337). (C) mNG::MKS-5 fluorescence in wild-type, *mks-2*, *nphp-4*, and the double mutant. Only one punctae of signal is visible in all genotypes. The fluorescence signal was consistently fainter in the double mutant. The scale bar is 1 μm. (D) MKS-2, JBTS-14, and MKS-6 are lost from the transition zone in the *mksr-2* null mutant. The scale bar is 10 μm. (E) Representative images of phasmid neurons TZs from worms expressing homozygous MKS-2::mNG in wild-type and *mksr-2* mutant backgrounds. Scale bar is 1 μm. (F) Quantification of the total fluorescence intensity of mNeonGreen at the TZ of phasmid cilia in a single plane. Normalized to wild-type. Black lines are the mean +/- SD. n is the number of phasmid pairs: WT(n=35), null/(n=28), P74S/(n=35), G155S(n=32). Statistical significance according to one-way ANOVA (p=0.22).

Figure S7

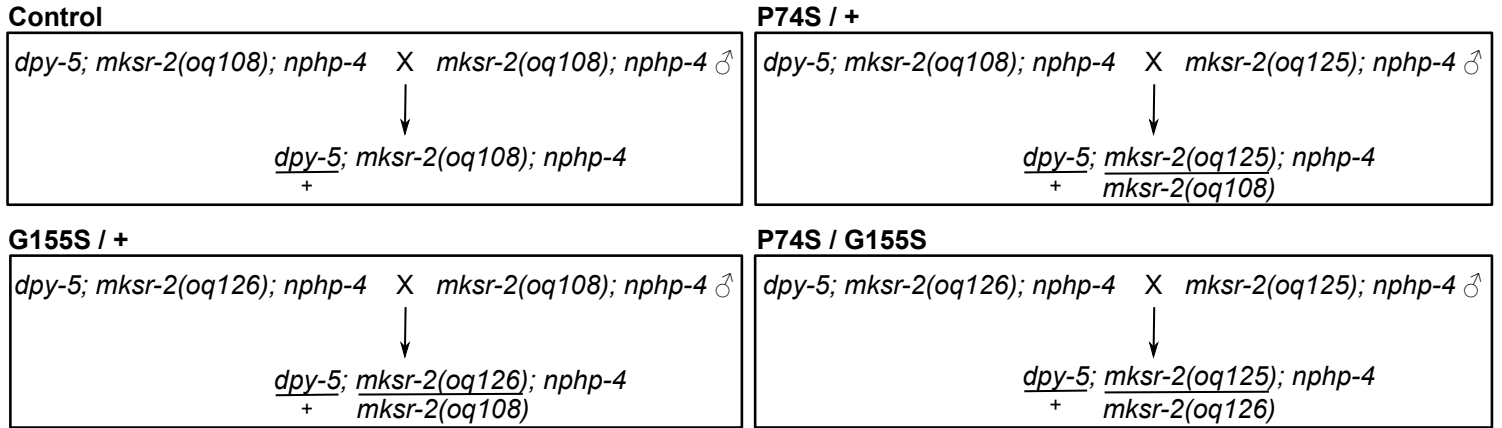

**Figure S7. (Related to Figure 7) Full genotypes of crosses used to generate heterozygous worms**

Crosses used to generate control, P74S/+, G155S/+, and P74S/G155S progeny for analysis in Figure 7 C, D, and E. All F1 progeny are homozygous for *nphp-4* and heterozygous for *dpy-5*.

**Table S1. Analysis of amphid channel ciliary ultrastructure in worms containing P74S and G155S.**

| Ciliary Region         | Phenotype                                               | <i>nphp-4</i><br>(N=3) | <i>hp-4; mksr-2(P74S)</i><br>(N=1) | <i>hp-4; mksr-2(G155S)</i><br>(N=1) |
|------------------------|---------------------------------------------------------|------------------------|------------------------------------|-------------------------------------|
| <b>Distal Segment</b>  | # axonemes / pore                                       | 7-9<br>(n=6)           | 2-5<br>(n=2)                       | 3-5<br>(n=2)                        |
|                        | # MT singlets / axoneme<br>(mean ± sd)                  | 6.7 ±1.95<br>(n=48)    | 5.7 ±1.11<br>(n=7)                 | 6.2 ±2.31<br>(n=7)                  |
| <b>Middle Segment</b>  | # axonemes / pore                                       | 9-10<br>(n=6)          | 5-6<br>(n=2)                       | 3-7<br>(n=2)                        |
|                        | # MT doublets / axoneme *<br>(mean ± sd)                | 8.7 ±0.37<br>(n=52)    | 8.8 ±0.60<br>(n=11)                | 8.5 ±1.07<br>(n=8)                  |
|                        | axonemes with open β-tubules<br>(including ADL, ASI) *  | 48%<br>(n=86)          | 63%<br>(n=11)                      | 25%<br>(n=8)                        |
| <b>Transition Zone</b> | axonemes with ectopic TZ<br>structure in PCMC cytoplasm | 13-31%<br>(n=34)       | 63-67%<br>(n=15)                   | 77-85%<br>(n=13)                    |

N is the number of worms analyzed, n values represent the number of each feature analyzed (axonemes, MTs, etc)

\* Due to analysis being performed on serial sections, the same axoneme may have been counted more than once.

MT, microtubules; TZ, transition zone; PCMC, periciliary membrane compartment.

**Table S2. List of *C. elegans* worms strains used in this study**

| Strain | Genotype                                                                          | Details               |
|--------|-----------------------------------------------------------------------------------|-----------------------|
| N2     | Wild-type                                                                         |                       |
|        | <i>nphp-4(tm925) V</i>                                                            | Deletion, null        |
|        | <i>mksr-2(tm2452) IV</i>                                                          | Deletion, null        |
|        | <i>mks-2(nx111) II</i>                                                            | Deletion, null        |
| OEB919 | <i>mksr-2(oq108) IV</i>                                                           | mNG::MKSR-2(+)        |
| OEB936 | <i>mksr-2(oq108,oq125) IV</i>                                                     | mNG::MKSR-2(P74S)     |
| OEB937 | <i>mksr-2(oq108,oq126) IV</i>                                                     | mNG::MKSR-2(G155S)    |
|        | <i>mksr-2(oq137) IV</i>                                                           | MKSR-2(P74S)          |
|        | <i>mksr-2(oq138) IV</i>                                                           | MKSR-2(G155S)         |
|        | <i>mksr-2(tm2452); nphp-4(tm925)</i>                                              |                       |
|        | <i>mksr-2(oq108); nphp-4(tm925)</i>                                               |                       |
|        | <i>mksr-2(oq108,oq125); nphp-4(tm925)</i>                                         |                       |
|        | <i>mksr-2(oq108,oq126); nphp-4(tm925)</i>                                         |                       |
| OEB958 | <i>mksr-2(oq137); nphp-4(tm925)</i>                                               |                       |
| OEB959 | <i>mksr-2(oq138); nphp-4(tm925)</i>                                               |                       |
| YH746  | <i>yhEx414[rpi-2::gfp + osm-5p::xbx1::tdTomato + pRF4]</i>                        |                       |
|        | <i>nphp-4(tm925); yhEx414</i>                                                     |                       |
|        | <i>mksr-2(tm2452); yhEx414</i>                                                    |                       |
|        | <i>mksr-2(oq108); yhEx414</i>                                                     |                       |
|        | <i>mksr-2(oq108,oq125); yhEx414</i>                                               |                       |
|        | <i>mksr-2(oq108,oq126); yhEx414</i>                                               |                       |
|        | <i>mksr-2(tm2452); nphp-4(tm925); yhEx414</i>                                     |                       |
|        | <i>mksr-2(oq108); nphp-4(tm925); yhEx414</i>                                      |                       |
|        | <i>mksr-2(oq108,oq125); nphp-4(tm925); yhEx414</i>                                |                       |
|        | <i>mksr-2(oq108,oq126); nphp-4(tm925); yhEx414</i>                                |                       |
| MX1420 | <i>nxEx[pbbs-8::tram-1::tdTomato + pbbs-8::mks-2::gfp + pRF4]</i>                 |                       |
|        | <i>mksr-2(tm2452); nxEx[pbbs-8::tram-1::tdTomato + pbbs-8::mks-2::gfp + pRF4]</i> |                       |
|        | <i>mksr-2(oq137); nxEx[pbbs-8::tram-1::tdTomato + pbbs-8::mks-2::gfp + pRF4]</i>  |                       |
|        | <i>mksr-2(oq138); nxEx[pbbs-8::tram-1::tdTomato + pbbs-8::mks-2::gfp + pRF4]</i>  |                       |
|        | <i>mksr-2(oq108); xbx-1(cas502) V</i>                                             | XBX-1::tagRFP::3xFLAG |
|        | <i>mksr-2(oq108,oq125); xbx-1(cas502)</i>                                         |                       |
|        | <i>mksr-2(oq108,oq126); xbx-1(cas502)</i>                                         |                       |
| OEB913 | <i>mks-2(oq101) II</i>                                                            | MKS-2::mNG            |
|        | <i>mks-2(oq101); nphp-4(tm925)</i>                                                |                       |
|        | <i>mks-2(oq101); mksr-2(tm2452)</i>                                               |                       |
|        | <i>mks-2(oq101); mksr-2(oq137)</i>                                                |                       |
|        | <i>mks-2(oq101); mksr-2(oq138)</i>                                                |                       |
| OEB914 | <i>cep-290(oq103) I</i>                                                           | CEP-290::mNG          |
|        | <i>cep-290(oq103); nphp-4(tm925)</i>                                              |                       |
|        | <i>cep-290(oq103); mksr-2(tm2452)</i>                                             |                       |
|        | <i>cep-290(oq103); mksr-2(oq137)</i>                                              |                       |
|        | <i>cep-290(oq103); mksr-2(oq138)</i>                                              |                       |
| OEB920 | <i>nphp-4(oq109) V</i>                                                            | mNG::NPHP-4           |
|        | <i>mks-2(nx111); nphp-4(oq109)</i>                                                |                       |
|        | <i>mksr-2(tm2452); nphp-4(oq109)</i>                                              |                       |
|        | <i>mksr-2(oq137); nphp-4(oq109)</i>                                               |                       |
|        | <i>mksr-2(oq138); nphp-4(oq109)</i>                                               |                       |
| OEB923 | <i>mks-5(oq112) II</i>                                                            | mNG::MKS-5            |
|        | <i>mks-5(oq112); nphp-4(tm925)</i>                                                |                       |
|        | <i>mks-5(oq112); mksr-2(tm2452)</i>                                               |                       |
|        | <i>mks-5(oq112); mksr-2(oq137)</i>                                                |                       |
|        | <i>mks-5(oq112); mksr-2(oq138)</i>                                                |                       |
|        | <i>mks-2(nx111) mks-5(oq112)</i>                                                  |                       |
|        | <i>mks-2(nx111) mks-5(oq112); nphp-4(tm925)</i>                                   |                       |
| OEB938 | <i>jbts-14(oq127) X</i>                                                           | mNG::JBTS-14          |
|        | <i>jbts-14(oq127); nphp-4(tm925)</i>                                              |                       |



|        |                                                        |            |
|--------|--------------------------------------------------------|------------|
|        | <i>mksr-2(tm2452); jbts-14(oq127)</i>                  |            |
|        | <i>mksr-2(oq137); jbts-14(oq127)</i>                   |            |
|        | <i>mksr-2(oq138); jbts-14(oq127)</i>                   |            |
| OEB939 | <i>mks-6(oq128) I</i>                                  | MKS-6::mNG |
|        | <i>mks-6(oq128); nphp-4(tm925)</i>                     |            |
|        | <i>mks-6(oq128); mksr-2(tm2452)</i>                    |            |
|        | <i>mks-6(oq128); mksr-2(oq137)</i>                     |            |
|        | <i>mks-6(oq128); mksr-2(oq138)</i>                     |            |
|        | <i>dpy-5(e907) I</i>                                   | Dpy        |
|        | <i>dpy-5(e907); mksr-2(oq108)</i>                      | Dpy        |
|        | <i>dpy-5(e907); mksr-2(oq108); nphp-4(tm925)</i>       | Dpy        |
|        | <i>dpy-5(e907); mksr-2(oq108,oq126)</i>                | Dpy        |
|        | <i>dpy-5(e907); mksr-2(oq108,oq126); nphp-4(tm925)</i> | Dpy        |



**Table S3. List of CRISPR/Cas9 guides and repair templates used in this study**

| Gene           |                     | Alleles generated   | Guide Sequence        | Linker  | Repair Template |
|----------------|---------------------|---------------------|-----------------------|---------|-----------------|
| <i>dpy-10</i>  | co-CRISPR           | ---                 | GCTACCATAGGCACCACGAG  | ---     | ssODN           |
| <i>unc-58</i>  | co-CRISPR           | ---                 | ATCCACGCACATGGTCACTA  | ---     | ssODN           |
| <i>mksr-2</i>  | mNG N-term knock-in | <i>oq108</i>        | CTTCGGCCATtttatcccgg  | GTGGGGS | PCR product     |
| <i>mksr-2</i>  | P74S                | <i>oq125, oq137</i> | CAGATTTGGAGCAAAAGTCG  | ---     | ssODN           |
| <i>mksr-2</i>  | G155S               | <i>oq126, oq138</i> | AAGATTGTCAGTGTGTGAC   | ---     | ssODN           |
| <i>nphp-4</i>  | mNG N-term knock-in | <i>oq109</i>        | gaaaaATGTCGGTCAACGAC  | GTGGGGS | PCR product     |
| <i>mks-5</i>   | mNG N-term knock-in | <i>oq112</i>        | AGGATACCTTGGGATAACCc  | GTGGGGS | PCR product     |
| <i>cep-290</i> | mNG C-term knock-in | <i>oq103</i>        | GTGGTAAGTGAACAGTGTtTT | GTGGGGS | PCR product     |
| <i>mks-2</i>   | mNG C-term knock-in | <i>oq101</i>        | ttatgacgcatgTCAGCCAC  | GTGGGGS | PCR product     |
| <i>jbts-14</i> | mNG N-term knock-in | <i>oq127</i>        | GGAACCTGGACGACTTGTGG  | GTGGGGS | PCR product     |
| <i>mks-6</i>   | mNG C-term knock-in | <i>oq128</i>        | TGGCTGTTCTTAAACCAAAA  | GTGGGGS | PCR product     |

| Gene           | Repair Template Sequence                                                                                                                |
|----------------|-----------------------------------------------------------------------------------------------------------------------------------------|
| <i>dpy-10</i>  | CACTTGAACCTCAATACGGCAAGATGAGAATGACTGGAAACCGTACCGCATGCGGTGCCTATGGTAGCGGAGCTTCACATGGCTTCAGACCAACAGCCTAT                                   |
| <i>unc-58</i>  | attttggtgtataaaaatagccgagtttaggaacaaaatcttctcagGTTTTCTGTGCTTACCATGTGCGTGGATCTTGCCTCCACACATCTCAAGGCGTACTT                                |
| <i>mksr-2</i>  | tcgcgagcccattgatccctccggataaaaATG...mNG+GGAACCGGAGGTGGCGGATCT...GCCGAAGTGTTCGTTTCGGGACAAAATTTTATCGGC                                    |
| <i>P74S</i>    | agacatcatgacacccccgacacatagatggaatttccagGTTGGTTCGCTCTCTTGTCTCCAAATCTGGCACCATGACAACCTACGGTAGACAGGAAATT                                   |
| <i>G155S</i>   | CTCAGCGCCCTGGAGGATCCGTCGATTCGCGAGAAGATTGCTCTGTCTCCGCTAGCGTCTGCAAAATTTGAATTGAATATATTACTAAAAATTTTCAGA                                     |
| <i>nphp-4</i>  | tactaaagtttggttaacaaagtctcgaaaaATG...mNG+GGAACCGGAGGTGGCGGATCTGGAGGTGGCGGATCT...GTCAACGACTGGTATTCGTTGTTCTGGCAAACCG                      |
| <i>mks-5</i>   | tgaacctcttataataataatacaaaattccagG...mNG+GGAACCGGAGGTGGCGGATCTGGAGGTGGCGGATCT...GTCTCCGCCAGGTATCCTATTGAAAAATGGAGCCGCCACAGCT             |
| <i>cep-290</i> | gttttttgtttcagAAAAATCGCATTGCTCATCTtCAGAACCCTCCACCTCCACAA...GGAACCGGAGGTGGCGGATCTGGAGGTGGCGGATCC+mNG...TGAttttttaataatatttttctgtaagaataa |
| <i>mks-2</i>   | tttaaatttgaaaaatatttccagACAACCCGCTAGT...GGAACCGGAGGTGGCGGATCT+mNG...TGAcatgctcataatccttcaaatcgaattagat                                  |
| <i>jbts-14</i> | tagatttttcaacttaccctctttcttttcaagATG...mNG+GGAACCGGAGGTGGCGGATCTGGAGGTGGCGGATCT...CCCCAACctcccGcCCAGTTCCTCCACCTCCCAAGAAGAAATCAGgta      |
| <i>mks-6</i>   | CATGTTATACAAATCGATATTGCTCTGGCTGTTCtAAgCCAAAgcGc...GGAACCGGAGGTGGCGGATCTGGAGGTGGCGGATCC+mNG...TAGaatttgaacttataactacatatatacattta        |
